# Supplementary material
Source: ML conference proceedings conference paper supplement (https://openaccess.thecvf.com/content/ICCV2023/html/Gu_Few-shot_Continual_Infomax_ICCV_2023_paper.html)
Supplement: Supplementary file 1 [file Gu_Few-shot_Continual_Infomax_ICCV_2023_supplemental.pdf]

# Supplementary Material for Few-shot Continual Infomax Learning

Ziqi Gu<sup>#</sup>, Chunyan Xu<sup>#</sup>, Jian Yang, Zhen Cui<sup>\*</sup>

PCA Lab, Key Lab of Intelligent Perception and Systems for High-Dimensional  
Information of Ministry of Education, School of Computer Science and Engineering,  
Nanjing University of Science and Technology, Nanjing, China.

{ziqigu, cyx, csjyang, zhen.cui}@njjust.edu.cn

## 1. Background Knowledge

**Entropy:** Entropy is a basic concept in information theory that represents a random variable as a measure of uncertainty [17]. For example,  $H(X)$  denotes the entropy of a random distribution  $X$ .

**Transfer Entropy:** Transfer entropy is a measure of the amount of information transferred by two stochastic processes. The transfer of stochastic process  $X$  to stochastic process  $Y$  is achieved by knowing the past of  $X$  to reduce the uncertainty of the future of  $Y$ , where the information is measured by entropy [2], formally:

$$\mathcal{T}_{X \rightarrow Y} = H(Y_t | Y_{t-1:t-L}) - H(Y_t | Y_{t-1:t-L}, X_{t-1:t-L}). \quad (1)$$

Eqn. 1 is equivalently transformed to conditional mutual information, formally:

$$\mathcal{T}_{X \rightarrow Y} = I(Y_t; X_{t-1:t-L} | Y_{t-1:t-L}). \quad (2)$$

**Mutual Information Estimation:** Mutual information(MI) is the reduction of uncertainty in one random variable due to the knowledge of another random variable [1, 7]. Specifically, it is the information obtained from one random variable through another random variable. For two random variables  $X$  and  $Y$ , the joint probability distribution is  $p(X, Y)$ . The mutual information between  $X$  and  $Y$  is given by,

$$I(X; Y) = \int dx dy p(X, Y) \log\left(\frac{p(X, Y)}{p(X)p(Y)}\right). \quad (3)$$

Mutual information is equivalently represented as,

$$\begin{aligned} I(X; Y) &= \sum_{x,y} p(x, y) \log\left(\frac{p(x, y)}{p(x)p(y)}\right) \\ &= \sum_{x,y} p(x, y) \log\left(\frac{p(x, y)}{p(x)}\right) - \sum_{x,y} p(x, y) \log p(y) \\ &= \sum_{x,y} p(x)p(y|x) \log(p(y|x)) - \sum_{x,y} p(x, y) \log p(y) \\ &= - \sum_x p(x)H(Y|X=x) - \sum_y \log p(y)p(y) \\ &= H(Y) - H(Y|X). \end{aligned} \quad (4)$$

where,  $H(X)$  is the marginal entropy,  $H(X|Y)$  is the conditional entropy,  $H(X, Y)$  is the joint entropy of  $X$  and  $Y$ . Thus,  $I(X; Y)$  equals  $H(X) - H(X|Y)$  and  $H(X) - H(X|Y)$  [1, 7].

Due to the high-dimensional feature vector, it is difficult to accurately compute the mutual information between two variables. Thus, the mutual information of two random variables  $X$  and  $Y$  can be represented by Kullback-Leibler divergence [5], formally:

$$\begin{aligned} I(X; Y) &= D_{KL}(p(X, Y) || p(X) \otimes p(Y)) \\ &= \mathbb{E}_{p(X, Y)}[\mathcal{F}] - \log \mathbb{E}_{p_X \otimes p_Y}[e^{\mathcal{F}}], \end{aligned} \quad (5)$$

where,  $p(X, Y)$  is the joint probability distribution of  $X$  and  $Y$ , all functions  $\mathcal{F}$  such that both expectations are finite. Since the mutual information of high-dimensional vectors is difficult to compute, to solve the Eqn. 5, we use neural network to estimate the maximum lower bound [1, 7].

$$\begin{aligned} I(X; Y) &\geq \hat{I}((X; Y), \vartheta^{MI}) \\ &= \mathbb{E}(\mathcal{F}((X; Y)), \vartheta^{MI}) - \log \mathbb{E}[e^{\mathcal{F}((X; Y), \vartheta^{MI})}]. \end{aligned} \quad (6)$$

Here,  $\vartheta^{MI}$  refers to a neural network to estimate mutual information between  $X$  and  $Y$ .

<sup>#</sup> Equal Contribution.

<sup>\*</sup> Corresponding Author.

Table 1. Few-shot continual classification performance of state-of-the-art methods and our FCIL on the CUB200 [16] dataset. The results with \* are obtained from the authors’ published code. FCIL outperforms second place by 2.02% in terms of the final accuracy and by 1.41% in terms of the Avg and by 1.35% in terms of the KR.

| Methods                  | Accuracy in each session (%) $\uparrow$ |              |              |              |              |              |              |              |              |              |              | KR $\uparrow$ | $\Delta$ Final $\uparrow$ | Avg $\uparrow$ |
|--------------------------|-----------------------------------------|--------------|--------------|--------------|--------------|--------------|--------------|--------------|--------------|--------------|--------------|---------------|---------------------------|----------------|
|                          | 1                                       | 2            | 3            | 4            | 5            | 6            | 7            | 8            | 9            | 10           | 11           |               |                           |                |
| Fi-CNN                   | 68.68                                   | 43.7         | 25.05        | 17.72        | 18.08        | 16.95        | 15.1         | 10.6         | 8.93         | 8.93         | 8.47         | 12.33         | +50.01                    | 22.02          |
| NCM [8]                  | 68.68                                   | 57.12        | 44.21        | 28.78        | 26.71        | 25.66        | 24.62        | 21.52        | 20.12        | 20.06        | 19.87        | 28.93         | +38.61                    | 32.49          |
| iCaRL [12]               | 68.68                                   | 52.65        | 48.61        | 44.16        | 36.62        | 29.52        | 27.83        | 26.26        | 24.01        | 23.89        | 21.16        | 30.80         | +37.32                    | 36.67          |
| EEIL [3]                 | 68.68                                   | 53.63        | 47.91        | 44.2         | 36.3         | 27.46        | 25.93        | 24.7         | 23.95        | 24.13        | 22.11        | 32.19         | +36.37                    | 36.27          |
| TOPIC [14]               | 68.68                                   | 62.49        | 54.81        | 49.99        | 45.25        | 41.4         | 38.35        | 35.36        | 32.22        | 28.31        | 26.28        | 38.26         | +32.20                    | 43.92          |
| SPPR [21]                | 68.68                                   | 61.85        | 57.43        | 52.68        | 50.19        | 46.88        | 44.65        | 43.07        | 40.17        | 39.63        | 37.33        | 54.35         | +21.15                    | 49.32          |
| Decoupled-DeepEMD [18]   | 75.35                                   | 70.69        | 66.68        | 62.34        | 59.76        | 56.54        | 54.61        | 52.52        | 50.73        | 49.20        | 47.60        | 63.17         | +10.88                    | 58.73          |
| Decoupled-NegCosine [11] | 74.96                                   | 70.57        | 66.62        | 61.32        | 60.09        | 56.06        | 55.03        | 52.78        | 51.50        | 50.08        | 48.47        | 64.66         | +10.01                    | 58.86          |
| Decoupled-Cosine [15]    | 75.52                                   | 70.95        | 66.46        | 61.20        | 60.86        | 56.88        | 55.40        | 53.49        | 51.94        | 50.93        | 49.31        | 65.29         | +9.17                     | 59.36          |
| CEC [19]                 | 75.8                                    | 71.94        | 68.5         | 63.5         | 62.43        | 58.27        | 57.73        | 55.81        | 54.83        | 53.52        | 52.28        | 68.97         | +6.20                     | 61.33          |
| MateFSCIL [4]            | 75.9                                    | 72.41        | 68.78        | 64.78        | 62.96        | 59.99        | 58.30        | 56.85        | 54.78        | 53.83        | 52.64        | 69.35         | +5.84                     | 61.93          |
| FACT* [20]               | 77.38                                   | 73.91        | <b>70.32</b> | 65.91        | 65.02        | 61.82        | 61.29        | 59.53        | 57.92        | 57.63        | 56.46        | 72.95         | +2.02                     | 64.29          |
| FCIL(Ours)               | <b>78.70</b>                            | <b>75.12</b> | 70.10        | <b>66.26</b> | <b>66.51</b> | <b>64.01</b> | <b>62.69</b> | <b>61.00</b> | <b>60.36</b> | <b>59.45</b> | <b>58.48</b> | <b>74.30</b>  |                           | <b>65.70</b>   |

Table 2. Few-shot continual classification performance of state-of-the-art methods and our FCIL on the CIFAR100 [10] dataset. The results with \* are obtained from the authors’ published code. FCIL outperforms second place by 0.7% in terms of the final accuracy and by 0.15% in terms of the Avg and by 0.2% in terms of the KR.

| Methods                  | Accuracy in each session (%) $\uparrow$ |              |              |              |              |              |              |              |              | KR $\uparrow$ | $\Delta$ Final $\uparrow$ | Avg $\uparrow$ |
|--------------------------|-----------------------------------------|--------------|--------------|--------------|--------------|--------------|--------------|--------------|--------------|---------------|---------------------------|----------------|
|                          | 1                                       | 2            | 3            | 4            | 5            | 6            | 7            | 8            | 9            |               |                           |                |
| Fi-CNN                   | 64.10                                   | 36.91        | 15.37        | 9.8          | 6.67         | 3.8          | 3.7          | 3.14         | 2.65         | 4.13          | +49.37                    | 16.24          |
| iCaRL [12]               | 64.10                                   | 53.28        | 41.69        | 34.13        | 27.93        | 25.06        | 20.41        | 15.48        | 13.73        | 21.41         | +38.65                    | 32.87          |
| NCM [8]                  | 64.10                                   | 53.05        | 43.96        | 36.97        | 31.61        | 26.73        | 21.23        | 16.78        | 13.54        | 21.12         | +38.48                    | 34.22          |
| EEIL [3]                 | 64.10                                   | 53.11        | 43.71        | 35.15        | 28.96        | 24.98        | 21.01        | 17.26        | 15.85        | 24.72         | +36.17                    | 33.79          |
| TOPIC [14]               | 64.10                                   | 55.88        | 47.07        | 45.16        | 40.11        | 36.38        | 33.96        | 31.55        | 29.37        | 45.81         | +22.65                    | 42.62          |
| Decoupled-DeepEMD [18]   | 69.75                                   | 65.06        | 61.20        | 57.21        | 53.88        | 51.40        | 48.80        | 46.84        | 44.41        | 63.67         | +7.61                     | 55.39          |
| Decoupled-NegCosine [11] | 74.36                                   | 68.23        | 62.84        | 59.24        | 55.32        | 52.88        | 50.86        | 48.98        | 46.66        | 62.73         | +5.36                     | 57.71          |
| Decoupled-Cosine [15]    | 74.55                                   | 67.43        | 63.63        | 59.55        | 56.11        | 53.80        | 51.68        | 49.67        | 47.68        | 63.95         | +4.34                     | 58.23          |
| CEC [19]                 | 73.07                                   | 68.88        | 65.26        | 61.19        | 58.09        | 55.57        | 53.22        | 51.34        | 49.14        | 67.25         | +2.61                     | 59.53          |
| MateFSCIL [4]            | 74.50                                   | 70.10        | 66.84        | 62.77        | 59.48        | 56.52        | 54.36        | 52.56        | 49.97        | 67.07         | +2.05                     | 60.79          |
| C-FSCIL Mode1(d=512) [6] | 77.47                                   | 72.20        | 67.53        | 63.23        | 59.58        | 56.67        | 53.94        | 51.55        | 49.36        | 63.71         | +2.66                     | 61.28          |
| C-FSCIL Mode2(d=512) [6] | 77.50                                   | <b>72.45</b> | 67.94        | 63.80        | 60.24        | 57.34        | 54.61        | 52.41        | 50.23        | 64.81         | +1.79                     | 61.84          |
| C-FSCIL Mode3(d=512) [6] | 77.47                                   | 72.40        | 67.47        | 63.25        | 59.84        | 56.95        | 54.42        | 52.47        | 50.47        | 65.14         | +1.55                     | 61.64          |
| FACT* [20]               | <b>78.44</b>                            | 72.33        | 68.23        | 63.90        | 60.58        | <b>58.20</b> | 55.96        | 53.59        | 51.32        | 65.43         | +0.70                     | 62.51          |
| FCIL(Ours)               | 77.12                                   | 72.42        | <b>68.31</b> | <b>64.47</b> | <b>61.18</b> | 58.17        | <b>56.06</b> | <b>54.19</b> | <b>52.02</b> | <b>67.45</b>  |                           | <b>62.66</b>   |

## 2. Datasets and other results

### 2.1. Datasets

**CIFAR100:** CIFAR100 [9] contains 100 classes with a total of 60,000 RGB images with the size  $32 \times 32$ , and each class contains 500 training images and 100 test images.

**CUB200:** CaltechUCSD Birds-200-2011(CUB200) [16] is a fine-grained classification dataset, which contains 11,788 images in 200 classes, each image size is  $224 \times 224$ .

**miniImagenet:** miniImageNet [13] is a subset of ImageNet, which contains 100 classes with 60,000 images, and each image size is  $84 \times 84$ .

### 2.2. Results of other datasets

In the main paper, we report the detailed performance of the miniImageNet. We report the performance of the CUB200 [16] and CIFAR100 [10] in Table 1 and Table 2. We can infer that our proposed FCIL has better final accuracy, Avg and KR, indicating FCIL better than state-of-the-art methods.

### Algorithm 1 Few-shot Continual Infomax Learning (FCIL)

**Require:** the training sets  $\{(X_t, Y_t) | t = 1, \dots, T\}$ , the number of previous sessions  $K$ .

**Ensure:** the final model  $\Theta$  and  $\vartheta$ .

```

1: while  $t = 1, 2, \dots, T$  do
2:   if  $t = 1$  then
3:     Optimize the base network  $\Theta^{base}$  and the MI network  $\vartheta^{MI}$  on the training set  $(X_1, Y_1)$ ;
4:     Construct base class structure  $S(A^t, R^t)$ ;
5:   else
6:     # for the  $t$ -th session data
7:     Learn new-class model  $\Theta_{fc}^t$  by feature embedding infomax  $\mathcal{L}_{FEI}$ ;
8:     Update class structure  $S(A^t, R^t)$ ;
9:     Update the classifier  $\Theta_{fc}$  by performing continual structure infomax  $\mathcal{L}_{CSI}$ ;
10:  end if
11: end while

```

## References

- [1] Mohamed Ishmael Belghazi, Aristide Baratin, Sai Rajeshwar, Sherjil Ozair, Yoshua Bengio, Aaron Courville, and Devon Hjelm. Mutual information neural estimation. In *International Conference on Machine Learning*, pages 531–540. PMLR, 2018. 1
- [2] Terry Bossomaier, Lionel Barnett, Michael Harré, and Joseph T Lizier. Transfer entropy. In *An introduction to transfer entropy*, pages 65–95. 2016. 1
- [3] Francisco M Castro, Manuel J Marín-Jiménez, Nicolás Guil, Cordelia Schmid, and Karteek Alahari. End-to-end incremental learning. In *Proceedings of the European Conference on Computer Vision*, pages 233–248, 2018. 2
- [4] Zhixiang Chi, Li Gu, Huan Liu, Yang Wang, Yuanhao Yu, and Jin Tang. Metafscl: A meta-learning approach for few-shot class incremental learning. In *Proceedings of the IEEE Conference on Computer Vision and Pattern Recognition*, pages 14166–14175, 2022. 2
- [5] Monroe D Donsker and SR Srinivasa Varadhan. On a variational formula for the principal eigenvalue for operators with maximum principle. *National Academy of Sciences*, 72(3):780–783, 1975. 1
- [6] Michael Hersche, Geethan Karunaratne, Giovanni Cherubini, Luca Benini, Abu Sebastian, and Abbas Rahimi. Constrained few-shot class-incremental learning. In *Proceedings of the IEEE Conference on Computer Vision and Pattern Recognition*, pages 9057–9067, 2022. 2
- [7] R Devon Hjelm, Alex Fedorov, Samuel Lavoie-Marchildon, Karan Grewal, Phil Bachman, Adam Trischler, and Yoshua Bengio. Learning deep representations by mutual information estimation and maximization. *arXiv preprint arXiv:1808.06670*, 2018. 1
- [8] Saihui Hou, Xinyu Pan, Chen Change Loy, Zilei Wang, and Dahua Lin. Learning a unified classifier incrementally via rebalancing. In *Proceedings of the IEEE Conference on Computer Vision and Pattern Recognition*, pages 831–839, 2019. 2
- [9] Alex Krizhevsky. Learning multiple layers of features from tiny images. 2009. 2
- [10] Alex Krizhevsky, Ilya Sutskever, and Geoffrey E. Hinton. Imagenet classification with deep convolutional neural networks. *Communications of The ACM*, 2012. 2
- [11] Bin Liu, Yue Cao, Yutong Lin, Qi Li, Zheng Zhang, Mingsheng Long, and Han Hu. Negative margin matters: Understanding margin in few-shot classification. In *Proceedings of the European Conference on Computer Vision*, pages 438–455. Springer, 2020. 2
- [12] Sylvestre-Alvise Rebuffi, Alexander Kolesnikov, Georg Sperl, and Christoph H. Lampert. icarl: Incremental classifier and representation learning. *Proceedings of the IEEE Conference on Computer Vision and Pattern Recognition*, 2016. 2
- [13] Olga Russakovsky, Jia Deng, Hao Su, Jonathan Krause, Sanjeev Satheesh, Sean Ma, Zhiheng Huang, Andrej Karpathy, Aditya Khosla, Michael Bernstein, et al. Imagenet large scale visual recognition challenge. *International journal of computer vision*, 115(3):211–252, 2015. 2
- [14] Xiaoyu Tao, Xiaopeng Hong, Xinyuan Chang, Songlin Dong, Xing Wei, and Yihong Gong. Few-shot class-incremental learning. In *Proceedings of the IEEE Conference on Computer Vision and Pattern Recognition*, pages 12183–12192, 2020. 2
- [15] Oriol Vinyals, Charles Blundell, Timothy Lillicrap, Daan Wierstra, et al. Matching networks for one shot learning. *Advances in neural information processing systems*, 29, 2016. 2
- [16] Catherine Wah, Steve Branson, Peter Welinder, Pietro Perona, and Serge Belongie. The caltech-ucsd birds-200-2011 dataset. 2011. 2
- [17] Alfred Wehrl. General properties of entropy. *Reviews of Modern Physics*, 50(2):221, 1978. 1
- [18] Chi Zhang, Yujun Cai, Guosheng Lin, and Chunhua Shen. Deepemd: Few-shot image classification with differentiable earth mover’s distance and structured classifiers. In *Proceedings of the IEEE Conference on Computer Vision and pattern recognition*, pages 12203–12213, 2020. 2
- [19] Chi Zhang, Nan Song, Guosheng Lin, Yun Zheng, Pan Pan, and Yinghui Xu. Few-shot incremental learning with continually evolved classifiers. In *Proceedings of the IEEE Conference on Computer Vision and Pattern Recognition*, pages 12455–12464, 2021. 2
- [20] Da-Wei Zhou, Fu-Yun Wang, Han-Jia Ye, Liang Ma, Shiliang Pu, and De-Chuan Zhan. Forward compatible few-shot class-incremental learning. In *Proceedings of the IEEE Conference on Computer Vision and Pattern Recognition*, pages 9046–9056, 2022. 2
- [21] Kai Zhu, Yang Cao, Wei Zhai, Jie Cheng, and Zheng-Jun Zha. Self-promoted prototype refinement for few-shot class-incremental learning. In *Proceedings of the IEEE Conference on Computer Vision and Pattern Recognition*, pages 6801–6810, 2021. 2
